# Supplementary material
Source: publisher figshare collection journal article supplement (https://geolsoc.figshare.com/ndownloader/files/13481093)
Supplement: Supplementary file 1 [file 13481093]

## Sheet: UAE Heavy Mineral Samples
Sample	Formation	Northing	Easting	Heavy Mineral counts (optical)	Heavy mineral geochemistry (ICP-AES)	Zircon dating
UAE_7847	Baynunah	283370	2.69222e+06	x	x
UAE_7849	Baynunah	255404	2.69356e+06	x	x
UAE_7850	Baynunah	255404	2.69356e+06	x	x
UAE_7851	Baynunah	255404	2.69356e+06	x	x
UAE_7864	Baynunah	35577.2	2.6747e+06	x	x
UAE_7867	Baynunah	35577.2	2.6747e+06	x	x
UAE_7870	Baynunah	66410.7	2.67084e+06	x	x
UAE_7871	Baynunah	66410.7	2.67084e+06	x	x
UAE_7874	Baynunah	73217.5	2.65126e+06	x	x
UAE_7878	Baynunah	80036.9	2.65619e+06	x	x
UAE_7879	Baynunah	46758.9	2.63571e+06	x	x
UAE_7880	Baynunah	50603.9	2.6819e+06	x	x
UAE_7975	Baynunah	259783	2.69023e+06	x	x
UAE_7976	Baynunah	259783	2.69023e+06	x	x
UAE_7981	Baynunah	270070	2.6844e+06	x	x
UAE_7982	Baynunah	270070	2.6844e+06	x	x
UAE_7986	Baynunah	246940	2.67899e+06	x	x
UAE_8029	Baynunah	-33248.6	2.66849e+06	x	x
UAE_8031	Baynunah	-33544.2	2.66454e+06	x	x
UAE_8033	Baynunah	-33486.3	2.66114e+06	x	x
UAE_8040	Baynunah	202432	2.64132e+06	x	x
UAE_8041	Baynunah	202432	2.64132e+06	x	x
UAE_8503	Baynunah	137628	2.66819e+06	x	x
UAE_8504	Baynunah	137628	2.66819e+06	x	x
UAE_8507	Baynunah	198075	2.66296e+06	x	x
UAE_7865	Baynunah	35577.2	2.6747e+06	x	x
UAE_7868	Baynunah	35577.2	2.6747e+06	x	x
UAE_8014	Baynunah	227561	2.64347e+06	x	x
UAE_8015	Baynunah	227561	2.64347e+06	x	x
UAE_8018	Baynunah	224246	2.64355e+06	x	x
UAE_8019	Baynunah	224246	2.64355e+06	x	x
UAE_8045	Baynunah	183622	2.65188e+06	x	x
UAE_6153	Dune sand	238259	2582750	x	x
UAE_6154	Dune sand	242967	2577886		x
UAE_6155	Dune sand	248829	2574304		x
UAE_6156	Dune sand	254638	2569559		x
UAE_6157	Dune sand	266782	2560977		x
UAE_6158	Dune sand	272620	2556061		x
UAE_6159	Dune sand	278547	2551392		x
UAE_6160	Dune sand	284703	2548365		x
UAE_6161	Dune sand	289690	2544871		x
UAE_6162	Dune sand	293806	2540682		x
UAE_7828	Dune Sand	329944	2.70811e+06	x	x
UAE_7829	Dune Sand	331445	2.70545e+06	x	x
UAE_7830	Dune Sand	335801	2.69899e+06	x	x
UAE_7831	Dune Sand	323342	2.70506e+06	x	x
UAE_7832	Dune Sand	323154	2.70486e+06	x	x
UAE_7833	Dune Sand	318698	2.70465e+06	x	x
UAE_7834	Dune Sand	311959	2.70412e+06	x	x
UAE_7835	Dune Sand	305386	2.70189e+06	x	x
UAE_7836	Dune Sand	304120	2.70146e+06	x	x
UAE_7837	Dune Sand	297645	2.70322e+06	x	x
UAE_7838	Dune Sand	289993	2.704e+06	x	x
UAE_7839	Dune Sand	282724	2.70459e+06	x	x
UAE_7840	Dune Sand	341411	2.7091e+06	x	x
UAE_7841	Dune Sand	349928	2.71029e+06	x	x
UAE_7842	Dune Sand	357886	2.7112e+06	x	x
UAE_7852	Dune Sand	187254	2.65909e+06	x	x
UAE_7881	Dune Sand	74851.2	2.63904e+06	x	x
UAE_7882	Dune Sand	75547.1	2.63764e+06	x	x
UAE_7884	Dune Sand	79655	2.62994e+06	x	x
UAE_7885	Dune Sand	80332	2.62889e+06	x	x
UAE_7886	Dune Sand	84575.6	2.61924e+06	x	x
UAE_7888	Dune Sand	90017.4	2.60921e+06	x	x
UAE_7889	Dune Sand	96060.2	2.59925e+06	x	x
UAE_7889SS	Dune Sand	96060.2	2.59925e+06	x	x
UAE_7890	Dune Sand	102955	2.58971e+06	x	x
UAE_7891	Dune Sand	104712	2.57869e+06	x	x
UAE_7893	Dune Sand	110481	2.57143e+06	x	x
UAE_7894	Dune Sand	117678	2.56491e+06	x	x
UAE_7895	Dune Sand	125238	2.5585e+06	x	x
UAE_7896	Dune Sand	131429	2.55028e+06	x	x
UAE_7897	Dune Sand	131693	2.54426e+06	x	x
UAE_7900	Dune Sand	131442	2.54045e+06	x	x
UAE_7926	Dune Sand	356607	2.8245e+06	x	x
UAE_7938	Dune Sand	379670	2.73526e+06	x	x
UAE_7939	Dune Sand	372086	2.73184e+06	x	x
UAE_7940	Dune Sand	365654	2.72819e+06	x	x
UAE_8022	Dune Sand	211095	2.65576e+06	x	x
UAE_8025	Dune Sand	162353	2.65941e+06	x	x
UAE_8500	Dune sand	130295	2.53349e+06	x	x
UAE_8508	Dune Sand	199254	2.6627e+06	x	x
UAE_8509	Dune Sand	207655	2.66471e+06	x	x
UAE_8513	Dune sand	251059	2.67152e+06	x	x
UAE_7907	Fuwayrit	287057	2.75616e+06	x	x
UAE_7979	Fuwayrit	245028	2.71694e+06	x	x
UAE_7980	Fuwayrit	245028	2.71694e+06	x	x
UAE_8012	Fuwayrit	233382	2.70256e+06	x	x
UAE_8013	Fuwayrit	233382	2.70256e+06	x	x
UAE_8024	Fuwayrit	162353	2.65941e+06	x	x
UAE_7843	Ghayathi	276638	2.68217e+06	x	x
UAE_7844	Ghayathi	276638	2.68217e+06	x	x
UAE_7848	Ghayathi	283370	2.69222e+06	x	x
UAE_7849a	Ghayathi	283370	2.69222e+06	x	x
UAE_7853	Ghayathi	202682	2.63914e+06	x	x
UAE_7877	Ghayathi	81954.2	2.65323e+06	x	x
UAE_7887	Ghayathi	85676	2.61732e+06	x	x
UAE_7902	Ghayathi	261042	2.72546e+06	x	x
UAE_7904	Ghayathi	264338	2.73118e+06	x	x
UAE_7908	Ghayathi	287057	2.75616e+06	x	x
UAE_7914	Ghayathi	357344	2.79222e+06	x	x
UAE_7977	Ghayathi	259783	2.69023e+06	x	x
UAE_7985	Ghayathi	253005	2.6754e+06	x	x
UAE_8010	Ghayathi	233382	2.70256e+06	x	x
UAE_8011	Ghayathi	233382	2.70256e+06	x	x
UAE_8016	Ghayathi	227561	2.64347e+06	x	x
UAE_8017	Ghayathi	227561	2.64347e+06	x	x
UAE_8020	Ghayathi	224246	2.64355e+06	x	x
UAE_8023	Ghayathi	162353	2.65941e+06	x	x
UAE_8511	Ghayathi	246142	2.68045e+06	x	x
UAE_8512	Ghayathi	246142	2.68045e+06	x	x
UAE_8515	Ghayathi	321560	2.75964e+06	x	x
UAE_7911	Hili	357344	2.79222e+06	x	x
UAE_7912	Hili	357344	2.79222e+06	x	x
UAE_7913	Hili	357344	2.79222e+06	x	x
UAE_7920	Hili	356438	2.79235e+06	x	x
UAE_7921	Hili	356438	2.79235e+06	x	x
UAE_7922	Hili	356438	2.79235e+06	x	x
UAE_7924	Hili	356438	2.79235e+06	x	x
UAE_7936	Hili	379670	2.73526e+06	x	x
UAE_7937	Hili	379670	2.73526e+06	x	x
UAE_7948	Hili	337675	2.66714e+06		x
UAE_7949	Hili	337675	2.66714e+06		x
UAE_7950	Hili	337675	2.66714e+06		x
UAE_7951	Hili	337675	2.66714e+06		x
UAE_7952	Hili	337675	2.66714e+06		x
UAE_7953	Hili	337675	2.66714e+06		x
UAE_7954	Hili	337675	2.66714e+06		x
UAE_7955	Hili	337675	2.66714e+06		x
UAE_7956	Hili	337675	2.66714e+06		x
UAE_7957	Hili	337675	2.66714e+06		x
UAE_7958	Hili	337675	2.66714e+06		x
UAE_7959	Hili	337675	2.66714e+06		x
UAE_7960	Hili	337675	2.66714e+06		x
UAE_7961	Hili	337675	2.66714e+06		x
UAE_7962	Hili	337675	2.66714e+06		x
UAE_7963	Hili	337675	2.66714e+06		x
UAE_7964	Hili	337675	2.66714e+06		x
UAE_7965	Hili	337675	2.66714e+06		x
UAE_7966	Hili	337675	2.66714e+06		x
UAE_7967	Hili	337675	2.66714e+06		x
UAE_7968	Hili	337675	2.66714e+06		x
UAE_7969	Hili	337675	2.66714e+06		x
UAE_7983	Hili	268505	2.68474e+06		x
UAE_7992	Hili	374271	2.69731e+06		x
UAE_7993	Hili	374271	2.69731e+06		x
UAE_7994	Hili	374271	2.69731e+06		x
UAE_7995	Hili	374271	2.69731e+06		x
UAE_7996	Hili	374271	2.69731e+06		x
UAE_7997	Hili	374271	2.69731e+06		x
UAE_7998	Hili	374271	2.69731e+06		x
UAE_7999	Hili	374271	2.69731e+06		x
UAE_8000	Hili	374271	2.69731e+06		x
UAE_8001	Hili	374271	2.69731e+06		x
UAE_8002	Hili	374271	2.69731e+06		x
UAE_8003	Hili	374271	2.69731e+06		x
UAE_8004	Hili	374271	2.69731e+06		x
UAE_8005	Hili	374271	2.69731e+06		x
UAE_8006	Hili	374271	2.69731e+06		x
UAE_8007	Hili	374271	2.69731e+06		x
UAE_7929	Limestone fan	399069	2.83851e+06	x	x
UAE_7933	Limestone fan	399069	2.83851e+06	x	x
UAE_7934	Limestone fan	399069	2.83851e+06	x	x
UAE_7935	Limestone fan	399069	2.83851e+06	x	x
UAE_7854	Madinat Zayed	167885	2.62574e+06	x	x
UAE_7855	Madinat Zayed	167885	2.62574e+06	x	x
UAE_7856	Madinat Zayed	167731	2.62598e+06	x	x
UAE_7857	Madinat Zayed	170157	2.62949e+06	x	x
UAE_7873	Madinat Zayed	73217.5	2.65126e+06	x	x
UAE_7876	Madinat Zayed	81954.2	2.65323e+06	x	x
UAE_7892	Madinat Zayed	107559	2.57463e+06	x	x
UAE_7898	Madinat Zayed	131442	2.54045e+06	x	x
UAE_7917	Madinat Zayed	356438	2.79235e+06	x	x
UAE_7918	Madinat Zayed	356438	2.79235e+06	x	x
UAE_7919	Madinat Zayed	356438	2.79235e+06	x	x
UAE_8036	Madinat Zayed	202096	2.64187e+06	x	x
UAE_8037	Madinat Zayed	202096	2.64187e+06	x	x
UAE_8042	Madinat Zayed	186576	2.63837e+06	x	x
UAE_8043	Madinat Zayed	186576	2.63837e+06	x	x
UAE_8034	Sabkha Mati	-20431.8	2.65338e+06	x
UAE_8035	Sabkha Mati	-20328.2	2.651e+06	x	x
UAE_7858	Shuwaihat	35577.2	2.6747e+06	x	x
UAE_7859	Shuwaihat	35577.2	2.6747e+06	x	x
UAE_7860	Shuwaihat	35577.2	2.6747e+06	x	x
UAE_7861	Shuwaihat	35577.2	2.6747e+06	x	x
UAE_7862	Shuwaihat	35577.2	2.6747e+06	x	x
UAE_7863	Shuwaihat	35577.2	2.6747e+06	x	x
UAE_8030	Shuwaihat	-32807.1	2.66462e+06	x	x
UAE_8032	Shuwaihat	-33486.3	2.66114e+06	x	x
UAE_8044	Shuwaihat	184730	2.65204e+06	x	x
UAE_8501	Shuwaihat	137628	2.66819e+06	x	x
UAE_8502	Shuwaihat	137628	2.66819e+06	x	x
UAE_8505	Shuwaihat	198075	2.66296e+06	x	x
UAE_8506	Shuwaihat	198075	2.66296e+06	x	x
		*UTM Zone 40 - see Farrant et al (2012) for more details
